# Supplementary material
Source: publisher site journal article supplement (https://www.dovepress.com/article/376547)
Supplement: Supplementary file 1 [file get_supplementary_file.php]

# Shared decision-making facilitates inhaler choice in patients with newly-diagnosed chronic obstructive pulmonary disease: a multicenter prospective study

## Supplementary Data

Yi-Han Hsiao <sup>1,2,3</sup>, Ching-Min Tseng <sup>2,4</sup>, Chau-Chyun Sheu <sup>5,6</sup>, Hsin-Yi Wang <sup>7,8</sup>,  
Hsin-Kuo Ko <sup>2,9</sup>, Kang-Cheng Su <sup>2,10</sup>, Chi-Wei Tao <sup>4</sup>, Ming-Ju Tsai <sup>5,6,\*</sup>, Yen-Fu Chen <sup>7,8,\*</sup>

- 1 Division of General Chest Medicine, Department of Chest Medicine, Taipei Veterans General Hospital, Taipei, Taiwan; [yihanhsiao@gmail.com](mailto:yihanhsiao@gmail.com) (Y.H.H.)
- 2 School of Medicine, College of Medicine, National Yang Ming Chiao Tung University, Taipei, Taiwan
- 3 Department and Institute of Physiology, College of Medicine, National Yang Ming Chiao Tung University, Taipei, Taiwan
- 4 Division of Chest Medicine, Department of Internal Medicine, Cheng-Hsin General Hospital, Taipei, Taiwan; [ponda0294@gmail.com](mailto:ponda0294@gmail.com) (C.M.T.); [davidtao\\_2001@yahoo.com](mailto:davidtao_2001@yahoo.com) (C.W.T.)
- 5 Division of Pulmonary and Critical Care Medicine, Department of Internal Medicine, Kaohsiung Medical University Hospital, Kaohsiung Medical University, Taiwan; [sheucc@gmail.com](mailto:sheucc@gmail.com) (C.C.S.); [SiegfriedTsai@gmail.com](mailto:SiegfriedTsai@gmail.com) (M.J.T.)
- 6 Department of Internal Medicine, School of Medicine, Kaohsiung Medical University, Taiwan
- 7 Division of Pulmonary and Critical Care Medicine, Department of Internal Medicine, National Taiwan University Hospital Yunlin Branch, Yunlin, Taiwan; [mimihsinyi0817@gmail.com](mailto:mimihsinyi0817@gmail.com) (H.Y.W.); [yenfu1228@gmail.com](mailto:yenfu1228@gmail.com) (Y.F.C.)
- 8 Graduate Institute of Clinical Medicine, College of Medicine, National Taiwan University, Taipei, Taiwan
- 9 Division of Respiratory Therapy, Department of Chest Medicine, Taipei Veterans General Hospital, Taipei, Taiwan; [kuohsink@ms67.hinet.net](mailto:kuohsink@ms67.hinet.net) (H.K.K.)
- 10 Division of Clinical Respiratory Physiology, Department of Chest Medicine, Taipei Veterans General Hospital, Taipei, Taiwan; [kcsu@vghtpe.gov.tw](mailto:kcsu@vghtpe.gov.tw) (K.C.S.)

\* Corresponding authors (M.J.T. and Y.F.C. contributed equally to this article.)

## Correspondence:

Ming-Ju Tsai, M.D., Ph.D. (ORCID: 0000-0003-3621-3334)

Division of Pulmonary and Critical Care Medicine, Department of Internal Medicine,  
Kaohsiung Medical University Hospital, No.100, Tz-You 1st Road, 807 Kaohsiung, Taiwan  
Tel.: +886 7 3121101, ext., 5651 Fax: +886 7 3161210  
E-mail: [SiegfriedTsai@gmail.com](mailto:SiegfriedTsai@gmail.com)

Yen-Fu Chen, M.D.

Division of Pulmonary and Critical Care Medicine, Department of Internal Medicine,  
National Taiwan University Hospital Yunlin Branch, Yunlin, Taiwan  
Tel.: +886 5 5323911, ext. 2501  
E-mail: [yenfu1228@gmail.com](mailto:yenfu1228@gmail.com)

**Shared decision-making (SDM) for choosing inhaler  
in patients with newly-diagnosed COPD**

**Who will need this information?**

- Patients who are diagnosed as chronic obstructive pulmonary disease (COPD) by physician and in need of inhaled dual bronchodilator treatment.

**Why and what should I know about the disease?**

- COPD is a disease mostly resulted from smoking. The disease will make you have chronic respiratory symptoms such as cough, sputum production, and/or shortness of breath.
- An inhaled dual bronchodilator treatment is a combination of drugs with two different mechanisms in a single inhaler. This treatment dilates your obstructed bronchi, relieves your respiratory symptoms, and prevent you from acute exacerbation of COPD.
- An inhaler is a container for your dual bronchodilator treatment, and a device that make the drugs be easily delivered into your lungs. There are currently two common choices for your dual bronchodilator treatment in Taiwan:
  - **Soft mist inhaler (SMI):** This inhaler allows the drugs been released as slowly moving aerosol that looks like soft mist.
  - **Dry powder inhaler (DPI):** This inhaler contains and delivers the drug as a dry powder.
- Wrong operation or irregular use of inhaler will lead to less effectiveness and/or increased adverse effects of your dual bronchodilator treatment.
- After reading this leaflet, discussing with your physician, and seeing demonstration by the educators, you will get better understanding with your inhaler choices. This “shared decision making (SDM)” process will help you explore your preferences and support your involvement in deciding the optimal inhaler.

## Which inhaler can I choose for my inhaled dual bronchodilator?

There are three choices as the following:

|                                          | <b>Spiolto® Respimat®<br/>soft mist inhaler<br/>(SMI)</b> | <b>Anoro® Ellipta®<br/>dry powder inhaler<br/>(DPI)</b>                                                 | <b>Ultibro® Breezhaler®<br/>dry powder inhaler<br/>(DPI)</b>                                                   |
|------------------------------------------|-----------------------------------------------------------|---------------------------------------------------------------------------------------------------------|----------------------------------------------------------------------------------------------------------------|
| <b>Frequency</b>                         | Once daily                                                | Once daily                                                                                              | Once daily                                                                                                     |
| <b>Dose</b>                              | 2 puffs                                                   | 1 puff                                                                                                  | 1 puff (capsule)                                                                                               |
| <b>How to use the inhaler</b>            | Turn – Open –<br>Press – Inhale – Close                   | Slide cover down until<br>a “click” – Inhale –<br>Slide the cover<br>upwards to cover the<br>mouthpiece | Open inhaler –<br>Insert the capsule –<br>Close inhaler –<br>Pierce capsule – Inhale –<br>Remove empty capsule |
| <b>Minimal inspiratory flow rate</b>     | Not required                                              | Required                                                                                                | Required                                                                                                       |
| <b>Dose counter</b>                      | Yes                                                       | Yes                                                                                                     | By blister card                                                                                                |
| <b>Adverse effects*</b>                  |                                                           |                                                                                                         |                                                                                                                |
| <b>Dry mouth</b>                         | Common                                                    | Common                                                                                                  | Uncommon                                                                                                       |
| <b>Upper respiratory tract infection</b> | Rare                                                      | Common                                                                                                  | Very common                                                                                                    |
| <b>Nasopharyngitis</b>                   | Rare                                                      | Common                                                                                                  | Common                                                                                                         |
| <b>Cough</b>                             | Uncommon                                                  | Common                                                                                                  | Common                                                                                                         |
| <b>Allergy</b>                           | Rare                                                      | Uncommon                                                                                                | Common                                                                                                         |

\* The frequency of adverse effects:

very common (10%), common (1-10%), uncommon (0.1-1%), rare (0.01%-0.1%) (CIOMS III).

## What should I do next?

- The educator will demonstrate these three inhalers in randomized order and answer your questions. You will be asked to choose **one** inhaler and answer the **reasons** why you choose the inhaler.
- You will be asked to demonstrate how to use your inhaler and the educator will record the errors during your demonstration.
- The educator will make sure you can use the inhaler completely correctly before you go home.
- An outpatient clinic appointment will be made **a month later**. You will be asked to demonstrate how to use your inhaler and the educator will record the errors during your demonstration.
- You will be asked to answer a questionnaire regarding your adherence, satisfaction score and willingness to keep the initial inhaler.

## Educator's checklist (English translation)

### Shared decision-making (SDM) for choosing inhaler in patients with newly diagnosed COPD

● Patient No.: \_\_\_\_\_

#### Visit 1

● **Order of demonstration:** (check random number table)

(1: Respimat®, 2: Ellipta®, 3: Breezhaler®): \_\_\_\_\_

● **The patient's choice** (1: Respimat®, 2: Ellipta®, 3: Breezhaler®): \_\_\_\_\_

● **Reasons of choosing the inhaler**

\_\_\_\_\_ Easy to carry, \_\_\_\_\_ Appears more effective, \_\_\_\_\_ Visible inhaled medication

\_\_\_\_\_ Delicate and textured, \_\_\_\_\_ Prefer the way of use this device, \_\_\_\_\_ Simple using

Others: \_\_\_\_\_

#### Visit 2

● **Adherence (according to the patient's answer):**

\_\_\_\_\_ Good (Use as the prescription daily); \_\_\_\_\_ Fair (Use in 5-6 days per week)

\_\_\_\_\_ Poor (Use ≤4 days per week)

● **Satisfaction score (according to the patient's answer):**

\_\_\_\_\_ 1 (Very unsatisfied); \_\_\_\_\_ 2 (unsatisfied); \_\_\_\_\_ 3 (fair); \_\_\_\_\_ 4 (satisfied); \_\_\_\_\_ 5 (very satisfied)

● **Willingness to keep the initial inhaler (according to the patient's answer):**

\_\_\_\_\_ YES; \_\_\_\_\_ NO

● Checklist of errors:

| Steps (use the corresponding steps of the patient's inhaler)                                                                                                                                                                                                                                                                                                                                                     | Visit 1                                    |                                                                                        | Visit 2                                    |                                                                                        |
|------------------------------------------------------------------------------------------------------------------------------------------------------------------------------------------------------------------------------------------------------------------------------------------------------------------------------------------------------------------------------------------------------------------|--------------------------------------------|----------------------------------------------------------------------------------------|--------------------------------------------|----------------------------------------------------------------------------------------|
|                                                                                                                                                                                                                                                                                                                                                                                                                  | Totally correct (0)<br>or<br>Any error (X) | How many times of<br>re-education<br>needed until the<br>patient can<br>correctly use? | Totally correct (0)<br>or<br>Any error (X) | How many times of<br>re-education<br>needed until the<br>patient can<br>correctly use? |
| <b>Steps of Respimat®</b>                                                                                                                                                                                                                                                                                                                                                                                        |                                            |                                                                                        |                                            |                                                                                        |
| Step 1: Press the safety catch button while firmly pulling the clear base straight off with your other hand. Be careful not to touch the piercing element.                                                                                                                                                                                                                                                       |                                            |                                                                                        |                                            |                                                                                        |
| Step 2: Insert the narrow end of your medication cartridge into the inhaler.                                                                                                                                                                                                                                                                                                                                     |                                            |                                                                                        |                                            |                                                                                        |
| Step 3: Place the inhaler on a flat surface, and push down firmly until it clicks into place.                                                                                                                                                                                                                                                                                                                    |                                            |                                                                                        |                                            |                                                                                        |
| Step 4: With the cap closed, turn the clear base in the direction of the arrows on the label until it clicks (half a turn). Push up on the small, circular opening tab until the cap snaps fully open. With the inhaler pointed toward the ground, press the dose release button. Look for a mist. Repeat 3 times until visible mists have been dispensed.                                                       |                                            |                                                                                        |                                            |                                                                                        |
| Step 5: With the cap closed, turn the clear base in the direction of the arrows on the label until it clicks (half a turn).                                                                                                                                                                                                                                                                                      |                                            |                                                                                        |                                            |                                                                                        |
| Step 6: Open the hinged cap by pushing up on the small, circular tab until the cap snaps fully open.                                                                                                                                                                                                                                                                                                             |                                            |                                                                                        |                                            |                                                                                        |
| Step 7: Breathe out slowly and fully. Close your lips around the mouthpiece without covering the air vents. Point the inhaler to the back of your throat. While taking a slow, deep breath through your mouth, press the dark gray dose release button and continue to breathe in. Hold your breath for 10 seconds or for as long as comfortable.                                                                |                                            |                                                                                        |                                            |                                                                                        |
| Step 8: Close the cap until you use your inhaler again. Repeat Turn, Open, Press (TOP) for your prescribed dosage.                                                                                                                                                                                                                                                                                               |                                            |                                                                                        |                                            |                                                                                        |
| <b>Steps of Ellipta®</b>                                                                                                                                                                                                                                                                                                                                                                                         |                                            |                                                                                        |                                            |                                                                                        |
| Step 1: Open the cover of the inhaler. Slide the cover down to expose the mouthpiece. You should hear a "click." The counter will count down by 1 number. You do not need to shake this kind of inhaler. Your inhaler is now ready to use.                                                                                                                                                                       |                                            |                                                                                        |                                            |                                                                                        |
| Step 2: While holding the inhaler away from your mouth, breathe out (exhale) fully. Do not breathe out into the mouthpiece. Put the mouthpiece between your lips and close your lips firmly around it. Your lips should fit over the curved shape of the mouthpiece. Take one long, steady, deep breath in through your mouth. Do not breathe in through your nose. Do not block the air vent with your fingers. |                                            |                                                                                        |                                            |                                                                                        |

|                                                                                                                                                                                                                                                                                                                                                 | Visit 1                                    |                                                                                        | Visit 2                                    |                                                                                        |
|-------------------------------------------------------------------------------------------------------------------------------------------------------------------------------------------------------------------------------------------------------------------------------------------------------------------------------------------------|--------------------------------------------|----------------------------------------------------------------------------------------|--------------------------------------------|----------------------------------------------------------------------------------------|
|                                                                                                                                                                                                                                                                                                                                                 | Totally correct (0)<br>or<br>Any error (X) | How many times of<br>re-education<br>needed until the<br>patient can<br>correctly use? | Totally correct (0)<br>or<br>Any error (X) | How many times of<br>re-education<br>needed until the<br>patient can<br>correctly use? |
| <b>Steps</b> (use the corresponding steps of the patient's inhaler)                                                                                                                                                                                                                                                                             |                                            |                                                                                        |                                            |                                                                                        |
| Step 3: Remove the inhaler from your mouth and hold your breath for about 3 to 4 seconds (or as long as is comfortable for you).                                                                                                                                                                                                                |                                            |                                                                                        |                                            |                                                                                        |
| Step 4: Breathe out slowly and gently. You may not taste or feel the medicine, even when you are using the inhaler correctly. Do not take another dose from the inhaler even if you do not feel or taste the medicine.                                                                                                                          |                                            |                                                                                        |                                            |                                                                                        |
| Step 5: Slide the cover up and over the mouthpiece as far as it will go.                                                                                                                                                                                                                                                                        |                                            |                                                                                        |                                            |                                                                                        |
| <b>Steps of Breezhaler®</b>                                                                                                                                                                                                                                                                                                                     |                                            |                                                                                        |                                            |                                                                                        |
| Step 1: Take the blister card from the box.                                                                                                                                                                                                                                                                                                     |                                            |                                                                                        |                                            |                                                                                        |
| Step 2: Separate one of the blisters from the blister card.                                                                                                                                                                                                                                                                                     |                                            |                                                                                        |                                            |                                                                                        |
| Step 3: Peel open the blister.                                                                                                                                                                                                                                                                                                                  |                                            |                                                                                        |                                            |                                                                                        |
| Step 4: remove a capsule from the blister.                                                                                                                                                                                                                                                                                                      |                                            |                                                                                        |                                            |                                                                                        |
| Step 5: Pull off cap and open inhaler                                                                                                                                                                                                                                                                                                           |                                            |                                                                                        |                                            |                                                                                        |
| Step 6: Insert the capsule in the compartment.                                                                                                                                                                                                                                                                                                  |                                            |                                                                                        |                                            |                                                                                        |
| Step 7: Close inhaler and hear a "click".                                                                                                                                                                                                                                                                                                       |                                            |                                                                                        |                                            |                                                                                        |
| Step 8: Hold the inhaler upright. Pierce capsule by firmly pressing both side buttons at the same time. You should hear a noise as the capsule is pierced. Then release side buttons.                                                                                                                                                           |                                            |                                                                                        |                                            |                                                                                        |
| Step 9: Breathe out fully. Do not blow into the inhaler. Place the mouthpiece in your mouth and close your lips firmly around it. Do not press the side buttons. Breathe in quickly and as deeply as you can. During inhalation you will hear a whirring noise. You may taste the medicine as you inhale. Hold your breath for up to 5 seconds. |                                            |                                                                                        |                                            |                                                                                        |
| Step 10: Check capsule is empty. Open the inhaler to see if any powder is left in the capsule. If there is powder left in the capsule: Close the inhaler and repeat step 9.                                                                                                                                                                     |                                            |                                                                                        |                                            |                                                                                        |
| Step 11: Remove empty capsule. Put the empty capsule in your household waste. Close the inhaler and replace the cap.                                                                                                                                                                                                                            |                                            |                                                                                        |                                            |                                                                                        |

## Supplementary Figures

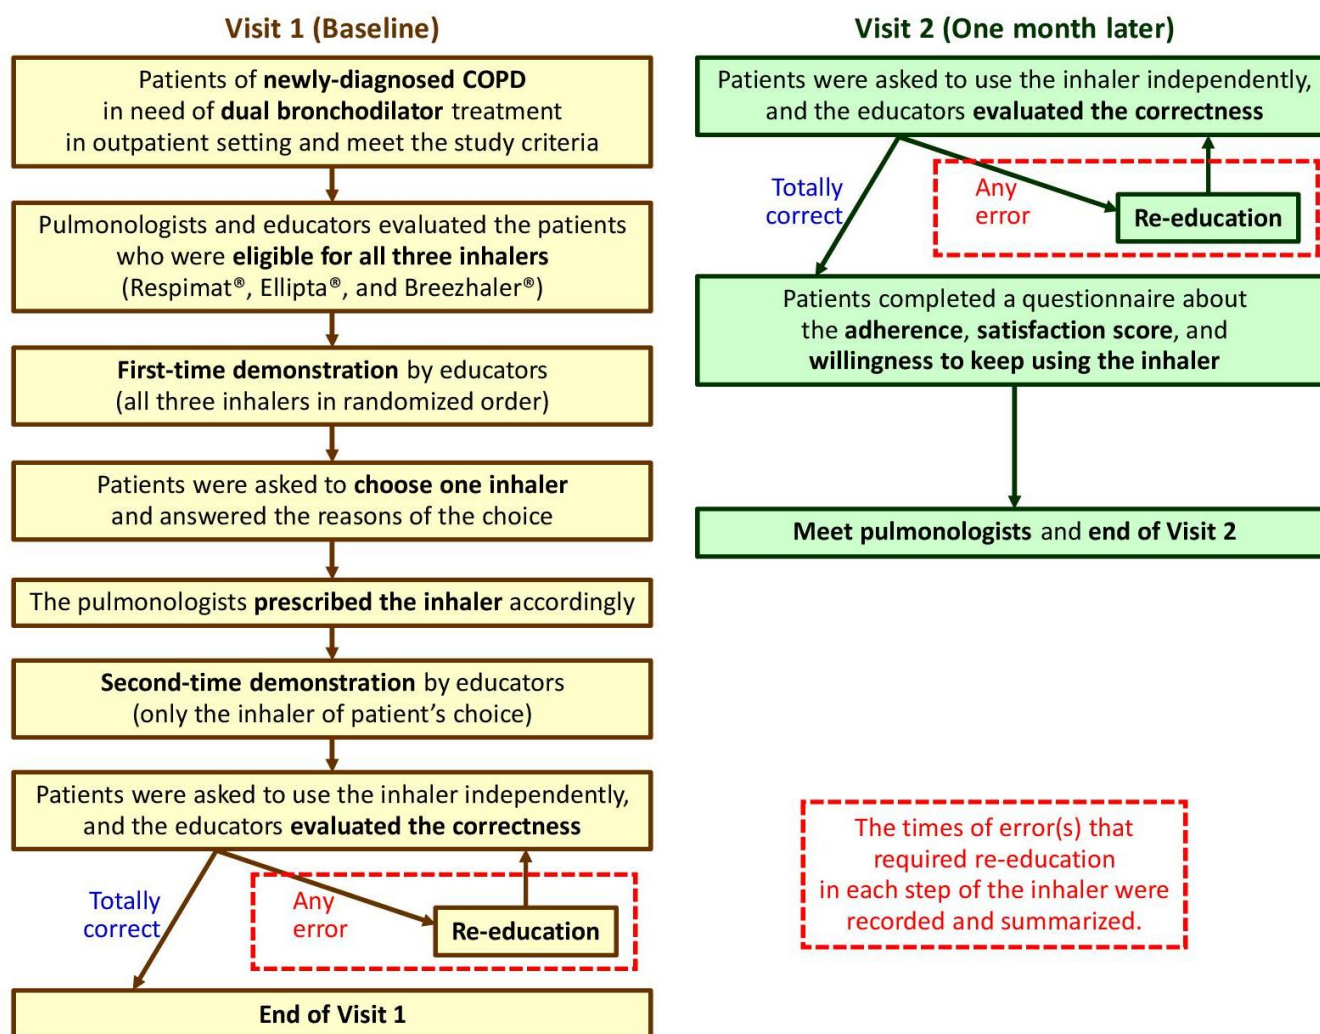

**Figure S1.** Flowchart of the study. Abbreviation: CAT = Chronic Obstructive Lung Disease Assessment Test.

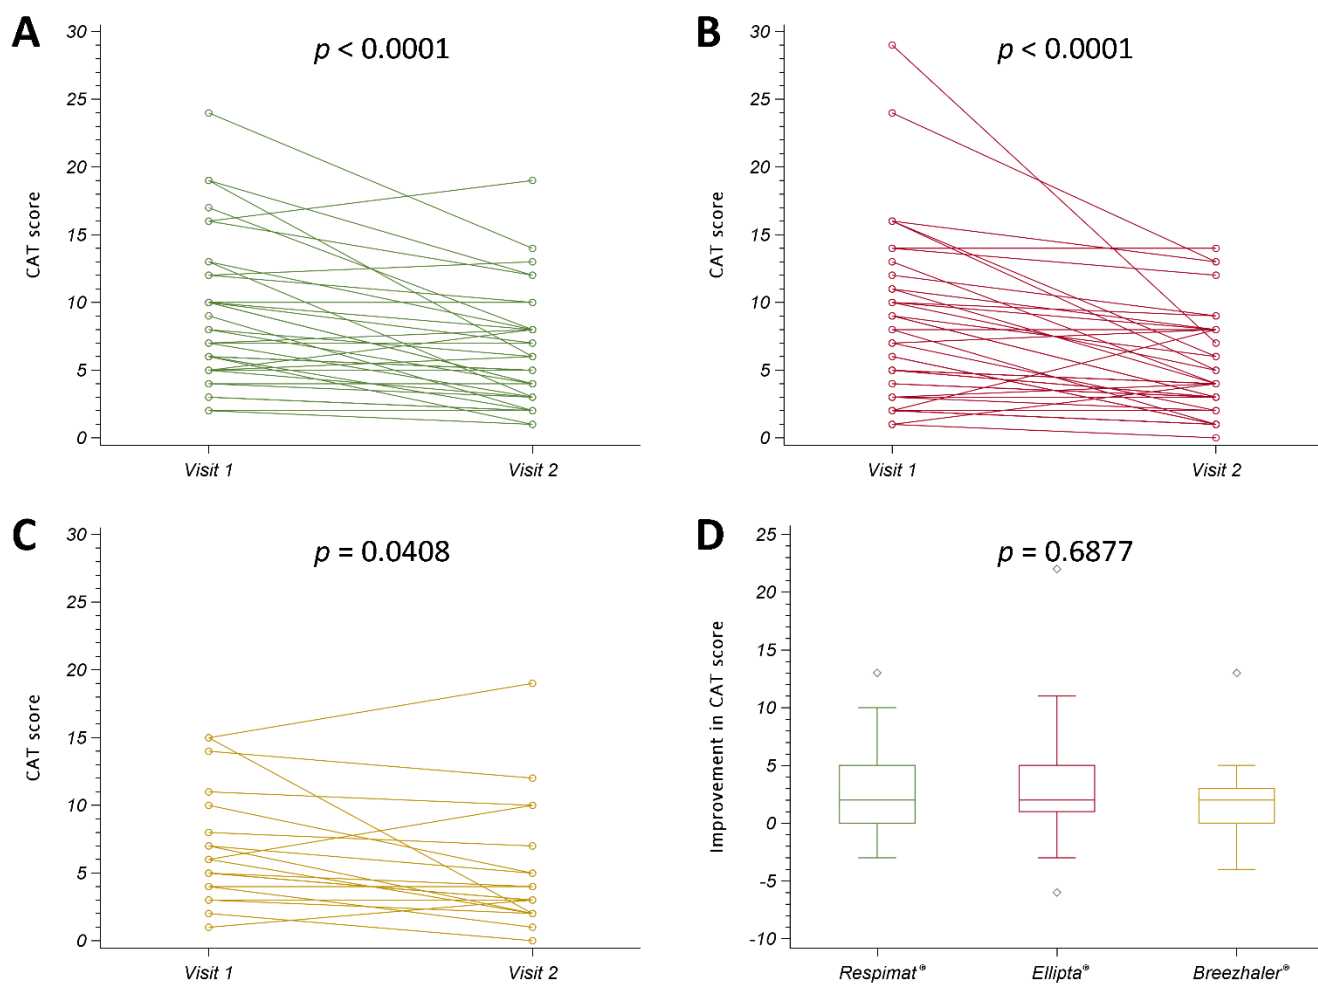

**Figure S2.** Changes in CAT score on visit 1 and visit 2 in the patients initially choosing Respimat® (A), Ellipta® (B), and Breezhaler® (C). (D) Comparing the improvement in CAT score in patients initially choosing different inhalers. *P* values were assessed with Wilcoxon signed-rank test (A,B,C) or Kruskal-Wallis test (D). Abbreviation: CAT = Chronic Obstructive Lung Disease Assessment Test.



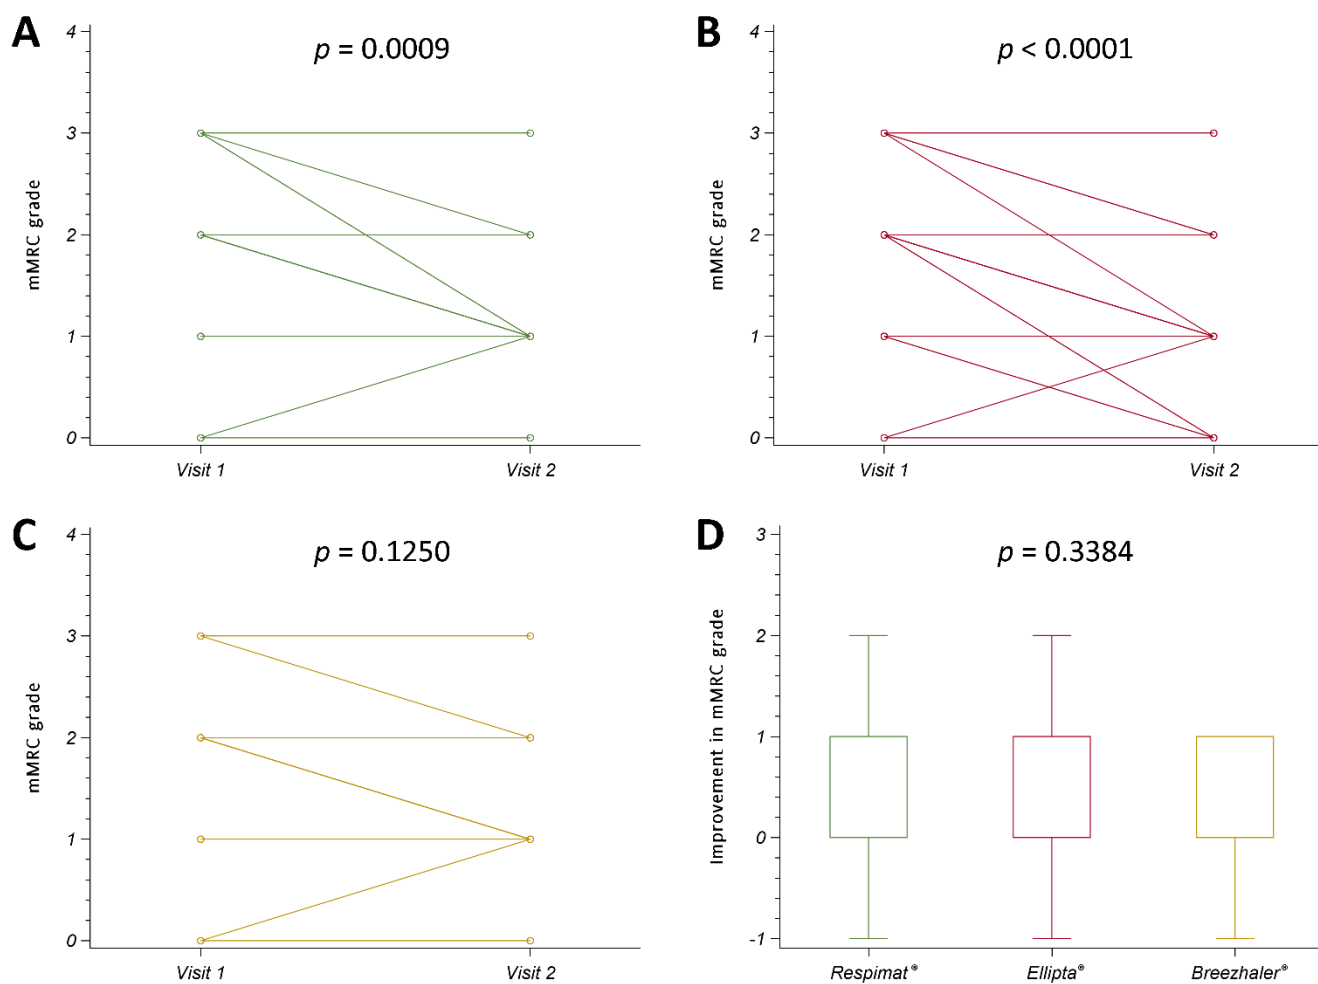

**Figure S3.** Changes in mMRC grade on visit 1 and visit 2 in the patients initially choosing Respimat® (A), Ellipta® (B), and Breezhaler® (C). (D) Comparing the improvement in mMRC grade in patients initially choosing different inhalers. *P* values were assessed with Wilcoxon signed-rank test (A,B,C) or Kruskal-Wallis test (D). Abbreviation: mMRC = Modified British Medical Research Council.

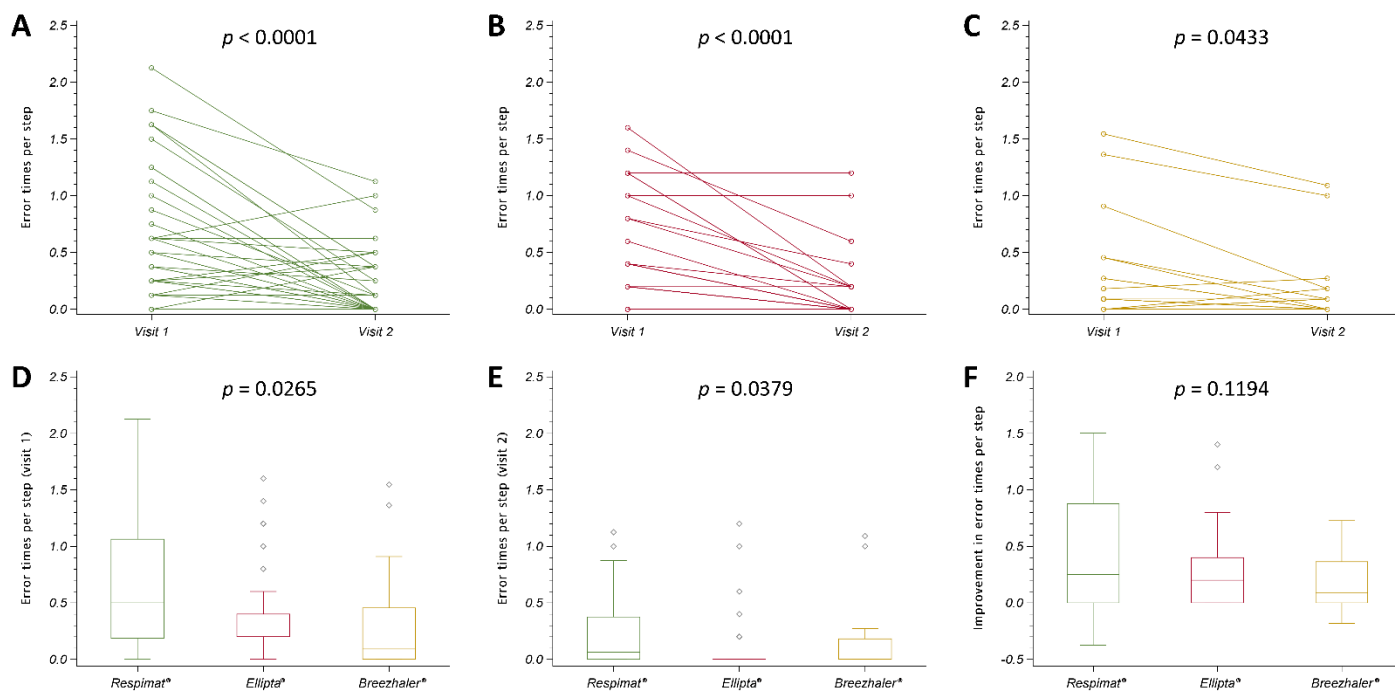

**Figure S4.** Changes in error times per step on visit 1 and visit 2 in the patients initially choosing Respimat® (A), Ellipta® (B), and Breezhaler® (C). Comparing the error times per step on visit 1 (D) and visit 2 (E) and the improvement in error times per step in patients initially choosing different inhalers.  $P$  values were assessed with Wilcoxon signed-rank test (A,B,C) or Kruskal-Wallis test (D,E,F).

## Supplementary Tables

**Table S1.** Baseline characteristics of all enrolled patients.

| Variables                              | Respimat®  | Ellipta®   | Breezhaler® | P value |
|----------------------------------------|------------|------------|-------------|---------|
| Number                                 | 43         | 45         | 21          |         |
| Age (years old)                        | 66 (61-72) | 69 (63-72) | 66 (64-74)  | 0.5964  |
| Male                                   | 39 (91%)   | 43 (96%)   | 20 (95%)    | 0.6915  |
| Education                              |            |            |             |         |
| Junior high school or lower            | 20 (47%)   | 27 (60%)   | 11 (52%)    | 0.2575  |
| Senior high school or higher           | 23 (53%)   | 18 (40%)   | 10 (48%)    |         |
| Smoking history                        |            |            |             |         |
| Current smoker                         | 29 (67%)   | 21 (47%)   | 9 (43%)     | 0.0444  |
| Ex-smoker                              | 10 (23%)   | 21 (47%)   | 12 (57%)    |         |
| Comorbidity (any)                      | 37 (86%)   | 42 (93%)   | 17 (81%)    | 0.2676  |
| Hand Tremor                            | 0 (0%)     | 1 (2%)     | 0 (0%)      | >0.999  |
| Old cerebral vascular accident         | 3 (7%)     | 3 (7%)     | 1 (5%)      | >0.999  |
| Depression                             | 2 (5%)     | 1 (2%)     | 1 (5%)      | 0.6786  |
| Insomnia                               | 5 (12%)    | 6 (13%)    | 4 (19%)     | 0.7147  |
| Obstructive sleep apnea                | 1 (2%)     | 0 (0%)     | 0 (0%)      | 0.5872  |
| Cataract                               | 9 (21%)    | 6 (13%)    | 3 (14%)     | 0.6677  |
| Other eye diseases                     | 3 (7%)     | 1 (2%)     | 0 (0%)      | 0.4155  |
| Coronary artery disease / MI           | 7 (16%)    | 9 (20%)    | 5 (24%)     | 0.7356  |
| Heart failure                          | 0 (0%)     | 1 (2%)     | 1 (5%)      | 0.5031  |
| Hypertension                           | 18 (42%)   | 26 (58%)   | 11 (52%)    | 0.3413  |
| Arrhythmia                             | 6 (14%)    | 4 (9%)     | 2 (10%)     | 0.7898  |
| Diabetes mellitus                      | 8 (19%)    | 10 (22%)   | 5 (24%)     | 0.8651  |
| Dyslipidemia                           | 10 (23%)   | 7 (16%)    | 2 (10%)     | 0.4067  |
| Pulmonary fibrosis                     | 1 (2%)     | 1 (2%)     | 0 (0%)      | >0.999  |
| Bronchiectasis                         | 1 (2%)     | 3 (7%)     | 0 (0%)      | 0.5252  |
| Chronic kidney disease                 | 0 (0%)     | 3 (7%)     | 1 (5%)      | 0.2427  |
| Cirrhosis                              | 0 (0%)     | 1 (2%)     | 0 (0%)      | >0.999  |
| Dental problems                        | 7 (16%)    | 1 (2%)     | 1 (5%)      | 0.0369  |
| Malignancy                             | 5 (12%)    | 5 (11%)    | 1 (5%)      | 0.8390  |
| Others                                 | 11 (26%)   | 14 (31%)   | 5 (24%)     | 0.8175  |
| Airflow limitation (GOLD grade)        |            |            |             |         |
| 1 ( $FEV_1 \geq 80\%pred$ )            | 10 (23%)   | 15 (33%)   | 6 (29%)     | 0.2471  |
| 2 ( $80\%pred > FEV_1 \geq 50\%pred$ ) | 30 (70%)   | 24 (53%)   | 10 (48%)    |         |
| 3 ( $50\%pred > FEV_1 \geq 30\%pred$ ) | 3 (7%)     | 6 (13%)    | 4 (19%)     |         |
| 4 ( $FEV_1 < 30\%pred$ )               | 0 (0%)     | 0 (0%)     | 1 (5%)      |         |

| <b>Variables</b>                         | <b>Respimat®</b> | <b>Ellipta®</b> | <b>Breezhaler®</b> | <b>P value</b> |
|------------------------------------------|------------------|-----------------|--------------------|----------------|
| Baseline CAT score                       | 8 (5-13)         | 7 (4-11)        | 6 (4-10)           | 0.1802         |
| <10                                      | 23 (53%)         | 29 (64%)        | 15 (71%)           | 0.3600         |
| ≥10                                      | 20 (47%)         | 16 (36%)        | 6 (29%)            |                |
| Baseline mMRC grade                      | 2 (1-2)          | 2 (1-2)         | 2 (1-2)            | 0.7820         |
| <2                                       | 17 (40%)         | 15 (33%)        | 8 (38%)            | 0.8406         |
| ≥2                                       | 26 (60%)         | 30 (67%)        | 13 (62%)           |                |
| Acute exacerbation (AE) in the past year |                  |                 |                    |                |
| No                                       | 37 (86%)         | 41 (91%)        | 19 (90%)           | 0.9302         |
| Mild AE (≥1 time)                        | 2 (5%)           | 2 (4%)          | 1 (5%)             |                |
| Moderate AE (once)                       | 2 (5%)           | 0 (0%)          | 0 (0%)             |                |
| ≥2 moderate AE or ≥1 severe AE           | 2 (5%)           | 2 (4%)          | 1 (5%)             |                |
| GOLD group                               |                  |                 |                    |                |
| A                                        | 11 (26%)         | 14 (31%)        | 8 (38%)            | 0.4215         |
| B                                        | 31 (72%)         | 29 (64%)        | 12 (57%)           |                |
| C                                        | 0 (0%)           | 2 (4%)          | 0 (0%)             |                |
| D                                        | 1 (2%)           | 0 (0%)          | 1 (5%)             |                |

Data are presented in n (%) or median (interquartile range).

P values were assessed with Fisher's exact test or Kruskal-Wallis test.

Abbreviations: MI = myocardial infarction; pred = predicted; GOLD = Global Initiative for Chronic Obstructive Lung Disease; CAT = COPD Assessment Test; mMRC = Modified British Medical Research Council.

**Table S2.** Order of demonstration and reasons of choosing the inhaler in patients completed two visits (N = 96).

| Variables                          | Respimat® | Ellipta® | Breezhaler® | P value |
|------------------------------------|-----------|----------|-------------|---------|
| Order of demonstration             |           |          |             |         |
| Respimat® – Ellipta® – Breezhaler® | 10 (28%)  | 8 (20%)  | 3 (16%)     | 0.8249  |
| Respimat® – Breezhaler® – Ellipta® | 5 (14%)   | 4 (10%)  | 3 (16%)     |         |
| Ellipta® – Respimat® – Breezhaler® | 5 (14%)   | 8 (20%)  | 4 (21%)     |         |
| Ellipta® – Breezhaler® – Respimat® | 5 (14%)   | 10 (24%) | 2 (11%)     |         |
| Breezhaler® – Respimat® – Ellipta® | 7 (19%)   | 4 (10%)  | 4 (21%)     |         |
| Breezhaler® – Ellipta® – Respimat® | 4 (11%)   | 7 (17%)  | 3 (16%)     |         |
| Reasons of choosing the inhaler    |           |          |             |         |
| Easy to carry                      | 3 (8%)    | 4 (10%)  | 5 (26%)     | 0.1567  |
| Appears more effective             | 6 (17%)   | 1 (2%)   | 2 (11%)     |         |
| Visible inhaled medication         | 11 (31%)  | 0 (0%)   | 12 (63%)    | <0.0001 |
| Delicate and textured              | 1 (3%)    | 0 (0%)   | 2 (11%)     |         |
| Prefer the way of use this device  | 12 (33%)  | 12 (29%) | 9 (47%)     | 0.3962  |
| Simple using                       | 12 (33%)  | 37 (90%) | 9 (47%)     |         |
| Others                             | 10 (28%)* | 0 (0%)   | 3 (16%)     | 0.0004  |

Data are presented in n (%).

P values were assessed with Fisher's exact test.

\* Six patients preferred soft mist rather than dry powder because of worrying about potential choking sensation or cough induced by dry powder; two patients felt that it was easier to inhale the mist sprayed from Respimat than to forcefully inhale the powder from Ellipta or Breezhaler.

**Table S3.** Order of demonstration and reasons of choosing the inhaler in all enrolled patients (N = 109).

| Variables                          | Respimat® | Ellipta® | Breezhaler® | P value |
|------------------------------------|-----------|----------|-------------|---------|
| Order of demonstration             |           |          |             |         |
| Respimat® – Ellipta® – Breezhaler® | 13 (30%)  | 9 (20%)  | 3 (14%)     | 0.3754  |
| Respimat® – Breezhaler® – Ellipta® | 7 (16%)   | 4 (9%)   | 5 (24%)     |         |
| Ellipta® – Respimat® – Breezhaler® | 5 (12%)   | 8 (18%)  | 4 (19%)     |         |
| Ellipta® – Breezhaler® – Respimat® | 6 (14%)   | 12 (27%) | 2 (10%)     |         |
| Breezhaler® – Respimat® – Ellipta® | 8 (19%)   | 4 (9%)   | 4 (19%)     |         |
| Breezhaler® – Ellipta® – Respimat® | 4 (9%)    | 8 (18%)  | 3 (14%)     |         |
| Reasons of choosing the inhaler    |           |          |             |         |
| Easy to carry                      | 5 (12%)   | 5 (11%)  | 6 (29%)     | 0.1698  |
| Appears more effective             | 7 (16%)   | 1 (2%)   | 3 (14%)     | 0.0362  |
| Visible                            | 16 (37%)  | 0 (0%)   | 12 (57%)    | <0.0001 |
| Delicate and textured              | 1 (2%)    | 0 (0%)   | 2 (10%)     | 0.0493  |
| The way of use                     | 14 (33%)  | 13 (29%) | 10 (48%)    | 0.3277  |
| Simple using                       | 14 (33%)  | 40 (89%) | 10 (48%)    | <0.0001 |
| Others                             | 10 (23%)  | 0 (0%)   | 3 (14%)     | 0.0009  |

Data are presented in n (%).

P values were assessed with Fisher's exact test.

**Table S4.** Number of patients with error(s) and times of error(s) that required re-education in all enrolled patients.

| Variables                                                                                                                                                                                                                   | Respimat®     | Ellipta®    | Breezhaler® | P value |
|-----------------------------------------------------------------------------------------------------------------------------------------------------------------------------------------------------------------------------|---------------|-------------|-------------|---------|
| <b>Correctness (visit 1)</b>                                                                                                                                                                                                |               |             |             |         |
| Any error                                                                                                                                                                                                                   | 37 (86%)      | 33 (73%)    | 13 (62%)    | 0.0862  |
| Totally correct                                                                                                                                                                                                             | 6 (14%)       | 12 (27%)    | 8 (38%)     |         |
| <b>Error times per step (visit 1)</b>                                                                                                                                                                                       | 0.5 (0.3-1.3) | 0.2 (0-0.4) | 0.1 (0-0.3) | 0.0039  |
| <b>Critical error (visit 1)</b>                                                                                                                                                                                             | 33 (77%)      | 33 (73%)    | 13 (62%)    | 0.4627  |
| Critical preparation error (visit 1)                                                                                                                                                                                        | 23 (53%)      | 13 (29%)    | 10 (48%)    | 0.0594  |
| Did not twist the base one half-turn                                                                                                                                                                                        | 20 (47%)      | N/A         | N/A         |         |
| Did not open the device correctly                                                                                                                                                                                           | 8 (19%)       | 13 (29%)    | 4 (19%)     |         |
| Did not place capsule in the chamber                                                                                                                                                                                        | N/A           | N/A         | 3 (14%)     |         |
| Did not close the mouthpiece                                                                                                                                                                                                | N/A           | N/A         | 3 (14%)     |         |
| Did not press button to pierce the capsule                                                                                                                                                                                  | N/A           | N/A         | 7 (33%)     |         |
| Critical delivery error (visit 1)                                                                                                                                                                                           | 30 (70%)      | 30 (67%)    | 9 (43%)     | 0.1050  |
| Did not seal lips around mouthpiece during inhalation, synchronize actuation and inhalation (Respimat only), inhale slowly (Respimat)/forcefully (Ellipta)/quickly (Breezhaler) and deeply, or hold breath after inhalation | 30 (70%)      | 30 (67%)    | 9 (43%)     |         |
| Did not remove capsule and check for powder residue                                                                                                                                                                         | N/A           | N/A         | 4 (19%)     |         |

Data are presented in n (%) or median (interquartile range).

P values were assessed with Fisher's exact test or Kruskal-Wallis test.

**Table S5.** Number of patients with error(s) and times of error(s) that required re-education in patients initially choosing Respimat®.

| Steps                                                                                                                                                                                                                                                                                                                                                      | Numbers of patients with error(s) |         |                      | Times of error(s) that required re-education |               |                      |
|------------------------------------------------------------------------------------------------------------------------------------------------------------------------------------------------------------------------------------------------------------------------------------------------------------------------------------------------------------|-----------------------------------|---------|----------------------|----------------------------------------------|---------------|----------------------|
|                                                                                                                                                                                                                                                                                                                                                            | Visit 1                           | Visit 2 | P value <sup>†</sup> | Visit 1                                      | Visit 2       | P value <sup>‡</sup> |
| Step 1: Press the safety catch button while firmly pulling the clear base straight off with your other hand. Be careful not to touch the piercing element.                                                                                                                                                                                                 | 17 (47%)                          | 9 (25%) | 0.0850               | 34, 0 (0-2)                                  | 13, 0 (0-0.5) | 0.0017               |
| Step 2: Insert the narrow end of your medication cartridge into the inhaler.                                                                                                                                                                                                                                                                               | 8 (22%)                           | 5 (14%) | 0.5414               | 13, 0 (0-0)                                  | 5, 0 (0-0)    | 0.0859               |
| Step 3: Place the inhaler on a flat surface, and push down firmly until it clicks into place.                                                                                                                                                                                                                                                              | 9 (25%)                           | 4 (11%) | 0.2196               | 14, 0 (0-0.5)                                | 4, 0 (0-0)    | 0.0474               |
| Step 4: With the cap closed, turn the clear base in the direction of the arrows on the label until it clicks (half a turn). Push up on the small, circular opening tab until the cap snaps fully open. With the inhaler pointed toward the ground, press the dose release button. Look for a mist. Repeat 3 times until visible mists have been dispensed. | 13 (36%)                          | 9 (25%) | 0.4432               | 26, 0 (0-1.5)                                | 11, 0 (0-0.5) | 0.0371               |
| Step 5: With the cap closed, turn the clear base in the direction of the arrows on the label until it clicks (half a turn).                                                                                                                                                                                                                                | 16 (44%)                          | 2 (6%)  | 0.0002               | 28, 0 (0-1)                                  | 3, 0 (0-0)    | 0.0011               |
| Step 6: Open the hinged cap by pushing up on the small, circular tab until the cap snaps fully open.                                                                                                                                                                                                                                                       | 7 (19%)                           | 3 (8%)  | 0.3070               | 11, 0 (0-0)                                  | 4, 0 (0-0)    | 0.1719               |
| Step 7: Breathe out slowly and fully. Close your lips around the mouthpiece without covering the air vents. Point the inhaler to the back of your throat. While taking a slow, deep breath through your mouth, press the dark gray dose release button and continue to breathe in. Hold your breath for 10 seconds or for as long as comfortable.          | 24 (67%)                          | 8 (22%) | 0.0003               | 43, 1 (0-2)                                  | 16, 0 (0-0)   | 0.0012               |
| Step 8: Close the cap until you use your inhaler again. Repeat Turn, Open, Press (TOP) for your prescribed dosage.                                                                                                                                                                                                                                         | 12 (33%)                          | 6 (17%) | 0.1727               | 17, 0 (0-1)                                  | 8, 0 (0-0)    | 0.0938               |

Numbers of patients with error(s) are presented in n (%).

Times of error(s) that required re-education are presented in sum, median (interquartile range).

<sup>†</sup> Fisher's exact test.

<sup>‡</sup> Wilcoxon signed-rank test.



**Table S6.** Number of patients with error(s) and times of error(s) that required re-education in patients initially choosing Ellipta®.

| Steps                                                                                                                                                                                                                                                                                                                                                                                                            | Numbers of patients with error(s) |         |                      | Times of error(s) that required re-education |            |                      |
|------------------------------------------------------------------------------------------------------------------------------------------------------------------------------------------------------------------------------------------------------------------------------------------------------------------------------------------------------------------------------------------------------------------|-----------------------------------|---------|----------------------|----------------------------------------------|------------|----------------------|
|                                                                                                                                                                                                                                                                                                                                                                                                                  | Visit 1                           | Visit 2 | P value <sup>†</sup> | Visit 1                                      | Visit 2    | P value <sup>‡</sup> |
| Step 1: Open the cover of the inhaler. Slide the cover down to expose the mouthpiece. You should hear a “click.” The counter will count down by 1 number. You do not need to shake this kind of inhaler. Your inhaler is now ready to use.                                                                                                                                                                       | 11 (27%)                          | 2 (5%)  | 0.0131               | 12, 0 (0-1)                                  | 2, 0 (0-0) | 0.0039               |
| Step 2: While holding the inhaler away from your mouth, breathe out (exhale) fully. Do not breathe out into the mouthpiece. Put the mouthpiece between your lips and close your lips firmly around it. Your lips should fit over the curved shape of the mouthpiece. Take one long, steady, deep breath in through your mouth. Do not breathe in through your nose. Do not block the air vent with your fingers. | 26 (63%)                          | 7 (18%) | <0.0001              | 39, 1 (0-1)                                  | 8, 0 (0-0) | <0.0001              |
| Step 3: Remove the inhaler from your mouth and hold your breath for about 3 to 4 seconds (or as long as is comfortable for you).                                                                                                                                                                                                                                                                                 | 17 (41%)                          | 5 (13%) | 0.0054               | 21, 0 (0-1)                                  | 6, 0 (0-0) | 0.0002               |
| Step 4: Breathe out slowly and gently. You may not taste or feel the medicine, even when you are using the inhaler correctly. Do not take another dose from the inhaler even if you do not feel or taste the medicine.                                                                                                                                                                                           | 7 (17%)                           | 2 (5%)  | 0.1549               | 8, 0 (0-0)                                   | 3, 0 (0-0) | 0.1875               |
| Step 5: Slide the cover up and over the mouthpiece as far as it will go.                                                                                                                                                                                                                                                                                                                                         | 5 (12%)                           | 2 (5%)  | 0.4321               | 5, 0 (0-0)                                   | 2, 0 (0-0) | 0.2500               |

Numbers of patients with error(s) are presented in n (%).

Times of error(s) that required re-education are presented in sum, median (interquartile range).

<sup>†</sup> Fisher's exact test.

<sup>‡</sup> Wilcoxon signed-rank test.

**Table S7.** Number of patients with error(s) and times of error(s) that required re-education in patients initially choosing Breezhaler®.

| Steps                                                                                                                                                                                                                                                                                                                                           | Numbers of patients with error(s) |         |                             | Times of error(s) that required re-education |             |                             |
|-------------------------------------------------------------------------------------------------------------------------------------------------------------------------------------------------------------------------------------------------------------------------------------------------------------------------------------------------|-----------------------------------|---------|-----------------------------|----------------------------------------------|-------------|-----------------------------|
|                                                                                                                                                                                                                                                                                                                                                 | Visit 1                           | Visit 2 | <i>P</i> value <sup>†</sup> | Visit 1                                      | Visit 2     | <i>P</i> value <sup>‡</sup> |
| Step 1: Take the blister card from the box.                                                                                                                                                                                                                                                                                                     | 4 (21%)                           | 2 (11%) | 0.6599                      | 4, 0 (0-0)                                   | 2, 0 (0-0)  | 0.5000                      |
| Step 2: Separate one of the blisters from the blister card.                                                                                                                                                                                                                                                                                     | 4 (21%)                           | 2 (11%) | 0.6599                      | 5, 0 (0-0)                                   | 2, 0 (0-0)  | 0.2500                      |
| Step 3: Peel open the blister.                                                                                                                                                                                                                                                                                                                  | 5 (26%)                           | 2 (11%) | 0.4048                      | 5, 0 (0-1)                                   | 2, 0 (0-0)  | 0.2500                      |
| Step 4: remove a capsule from the blister.                                                                                                                                                                                                                                                                                                      | 3 (16%)                           | 2 (11%) | >0.999                      | 3, 0 (0-0)                                   | 2, 0 (0-0)  | >0.999                      |
| Step 5: Pull off cap and open inhaler                                                                                                                                                                                                                                                                                                           | 4 (21%)                           | 2 (11%) | 0.6599                      | 4, 0 (0-0)                                   | 2, 0 (0-0)  | 0.5000                      |
| Step 6: Insert the capsule in the compartment.                                                                                                                                                                                                                                                                                                  | 3 (16%)                           | 2 (11%) | >0.999                      | 4, 0 (0-0)                                   | 2, 0 (0-0)  | 0.5000                      |
| Step 7: Close inhaler and hear a “click”.                                                                                                                                                                                                                                                                                                       | 3 (16%)                           | 2 (11%) | >0.999                      | 4, 0 (0-0)                                   | 2, 0 (0-0)  | 0.5000                      |
| Step 8: Hold the inhaler upright. Pierce capsule by firmly pressing both side buttons at the same time. You should hear a noise as the capsule is pierced. Then release side buttons.                                                                                                                                                           | 6 (32%)                           | 3 (16%) | 0.4470                      | 8, 0 (0-1)                                   | 3, 0 (0-0)  | 0.1875                      |
| Step 9: Breathe out fully. Do not blow into the inhaler. Place the mouthpiece in your mouth and close your lips firmly around it. Do not press the side buttons. Breathe in quickly and as deeply as you can. During inhalation you will hear a whirring noise. You may taste the medicine as you inhale. Hold your breath for up to 5 seconds. | 8 (42%)                           | 8 (42%) | >0.999                      | 18, 0 (0-2)                                  | 12, 0 (0-1) | 0.4243                      |
| Step 10: Check capsule is empty. Open the inhaler to see if any powder is left in the capsule. If there is powder left in the capsule: Close the inhaler and repeat step 9.                                                                                                                                                                     | 4 (21%)                           | 3 (16%) | >0.999                      | 7, 0 (0-0)                                   | 3, 0 (0-0)  | 0.2500                      |
| Step 11: Remove empty capsule. Put the empty capsule in your household waste. Close the inhaler and replace the cap.                                                                                                                                                                                                                            | 2 (11%)                           | 2 (11%) | >0.999                      | 2, 0 (0-0)                                   | 2, 0 (0-0)  | #                           |

Numbers of patients with error(s) are presented in n (%).

Times of error(s) that required re-education are presented in sum, median (interquartile range).

<sup>†</sup> Fisher's exact test.

<sup>‡</sup> Wilcoxon signed-rank test.

# The *p* value cannot be assessed due to exactly equal values in both visits.

**Table S8.** Number of patients with error(s) and times of error(s) that required re-education in two visits.

| Variables                                                                                                                                                                                                                       | Visit 1                | Visit 2                | P value  |
|---------------------------------------------------------------------------------------------------------------------------------------------------------------------------------------------------------------------------------|------------------------|------------------------|----------|
| <b>Correctness</b>                                                                                                                                                                                                              |                        |                        |          |
| Any error                                                                                                                                                                                                                       | 73 (76%)               | 36 (38%)               | <0.0001  |
| Totally correct                                                                                                                                                                                                                 | 23 (24%)               | 60 (63%)               |          |
| <b>Error times per step</b>                                                                                                                                                                                                     | 46.1,<br>0.3 (0.1-0.7) | 15.3,<br>0.0 (0.0-0.2) | <0.0001‡ |
| <b>Critical error</b>                                                                                                                                                                                                           | 69 (72%)               | 28 (29%)               | <0.0001  |
| Critical preparation error                                                                                                                                                                                                      | 38 (40%)               | 8 (8%)                 | <0.0001  |
| Did not twist the base one half-turn                                                                                                                                                                                            | 16 (44%)               | 2 (6%)                 | 0.0002   |
| Did not open the device correctly                                                                                                                                                                                               | 22 (23%)               | 7 (7%)                 | 0.0042   |
| Did not place capsule in the chamber                                                                                                                                                                                            | 3 (16%)                | 2 (11%)                | >0.999   |
| Did not close the mouthpiece                                                                                                                                                                                                    | 3 (16%)                | 2 (11%)                | >0.999   |
| Did not press button to pierce the capsule                                                                                                                                                                                      | 6 (32%)                | 3 (16%)                | 0.4470   |
| Critical delivery error                                                                                                                                                                                                         | 60 (63%)               | 25 (26%)               | <0.0001  |
| Did not seal lips around mouthpiece during inhalation, synchronize actuation and inhalation (Respimat® only), inhale slowly (Respimat®)/forcefully (Ellipta®)/quickly (Breezhaler®) and deeply, or hold breath after inhalation | 60 (63%)               | 25 (26%)               | <0.0001  |
| Did not remove capsule and check for powder residue                                                                                                                                                                             | 4 (21%)                | 3 (16%)                | >0.999   |

Data are presented in n (%) or sum, median (interquartile range).

P values were assessed with Fisher's exact test except for those labelled with ‡ (using Wilcoxon signed-rank test).

† Fisher's exact test.

‡ Wilcoxon signed-rank test.

**Table S9.** Factors associated with any critical error in two visits.

| Variable                         | Any critical error (visit 1) |                | Any critical error (visit 2) |                |
|----------------------------------|------------------------------|----------------|------------------------------|----------------|
|                                  | Univariate                   | Multivariable  | Univariate                   | Multivariable  |
| Inhaler chosen initially         |                              |                |                              |                |
| Respimat®                        | 1.5 [0.5-5.0]                | 1.6 [0.4-5.9]  | 0.4 [0.1-1.4]                | 0.4 [0.1-1.6]  |
| Ellipta®                         | 1.8 [0.6-5.8]                | 2.0 [0.6-7.0]  | 0.3 [0.1-1.0]                | 0.3 [0.1-1.1]  |
| Breezhaler®                      | ref                          | ref            | ref                          | ref            |
| Age                              |                              |                |                              |                |
| <65                              | ref                          | ref            | ref                          | ref            |
| ≥65                              | 0.9 [0.4-2.4]                | 0.9 [0.3-2.6]  | 1.5 [0.6-3.8]                | 1.3 [0.4-3.7]  |
| Sex                              |                              |                |                              |                |
| Female                           | ref                          | ref            | ref                          | ref            |
| Male                             | 0.5 [0.1-4.4]                | 0.3 [0-6.7]    | 0.8 [0.1-4.7]                | 0.5 [0.0-7.7]  |
| Education                        |                              |                |                              |                |
| Junior high school or lower      | ref                          | ref            | ref                          | ref            |
| Senior high school or higher     | 0.5 [0.2-1.2]                | 0.6 [0.2-1.6]  | 0.6 [0.3-1.6]                | 0.7 [0.3-2.0]  |
| Smoking history                  |                              |                |                              |                |
| Never smoker                     | ref                          | ref            | ref                          | ref            |
| Ever smoker                      | 1.3 [0.2-7.5]                | 2.5 [0.2-33.6] | 2.1 [0.2-19.2]               | 3.0 [0.1-81.1] |
| Comorbidity                      |                              |                |                              |                |
| No                               | ref                          | ref            | ref                          | ref            |
| Yes                              | 0.6 [0.1-3.1]                | 0.4 [0.1-2.6]  | 1.7 [0.3-8.7]                | 1.7 [0.3-10.7] |
| Airflow limitation (GOLD grade)  |                              |                |                              |                |
| 1 or 2 ( $FEV_1 \geq 50\%$ pred) | ref                          | ref            | ref                          | ref            |
| 3 or 4 ( $FEV_1 < 50\%$ pred)    | 1.0 [0.3-3.4]                | 1.1 [0.3-5.2]  | 2.9 [0.9-9.3]                | 1.5 [0.4-6.4]  |
| Acute exacerbation within a year |                              |                |                              |                |
| No                               | ref                          | ref            | ref                          | ref            |
| Yes                              | 0.8 [0.2-3.3]                | 0.6 [0.1-3.4]  | 3.5 [0.9-14.1]               | 3.0 [0.5-16.3] |
| CAT score (visit 1)              |                              |                |                              |                |
| <10                              | ref                          | ref            | ref                          | ref            |
| ≥10                              | 2.4 [0.9-6.7]                | 2.3 [0.8-7.0]  | 1.9 [0.8-4.8]                | 1.7 [0.6-4.6]  |

Data are analysed by logistic regression and presented in odds ratio (95% confidence interval).

Abbreviations: pred = predicted; GOLD = Global Initiative for Chronic Obstructive Lung Disease; CAT = COPD Assessment Test.

**Table S10.** Factors associated with any critical error in visit 1 (all enrolled patients).

| Variable                         | Any critical error (visit 1) |                |
|----------------------------------|------------------------------|----------------|
|                                  | Univariate                   | Multivariable  |
| Inhaler chosen initially         |                              |                |
| Respimat®                        | 2.0 [0.7-6.3]                | 2.0 [0.6-7.0]  |
| Ellipta®                         | 1.7 [0.6-5.1]                | 1.8 [0.6-5.8]  |
| Breezhaler®                      | ref                          | ref            |
| Age                              |                              |                |
| <65                              | ref                          | ref            |
| ≥65                              | 1.0 [0.4-2.3]                | 1.0 [0.4-2.5]  |
| Sex                              |                              |                |
| Female                           | ref                          | ref            |
| Male                             | 0.4 [0.0-3.6]                | 0.3 [0.0-5.4]  |
| Education                        |                              |                |
| Junior high school or lower      | ref                          | ref            |
| Senior high school or higher     | 0.6 [0.2-1.3]                | 0.6 [0.3-1.6]  |
| Smoking history                  |                              |                |
| Never smoker                     | ref                          | ref            |
| Ever smoker                      | 1.1 [0.2-5.8]                | 2.6 [0.2-34.6] |
| Comorbidity                      |                              |                |
| No                               | ref                          | ref            |
| Yes                              | 0.8 [0.2-3.0]                | 0.6 [0.1-2.7]  |
| Airflow limitation (GOLD grade)  |                              |                |
| 1 or 2 ( $FEV_1 \geq 50\%$ pred) | ref                          | ref            |
| 3 or 4 ( $FEV_1 < 50\%$ pred)    | 0.9 [0.3-3.3]                | 1.0 [0.3-4.4]  |
| Acute exacerbation within a year |                              |                |
| No                               | ref                          | ref            |
| Yes                              | 1.2 [0.3-4.6]                | 1.0 [0.2-4.7]  |
| CAT score (visit 1)              |                              |                |
| <10                              | ref                          | ref            |
| ≥10                              | 2.1 [0.8-5.2]                | 1.8 [0.7-4.9]  |

Data are analysed by logistic regression and presented in odds ratio (95% confidence interval).

\*  $P$  value < 0.05.

Abbreviations: pred = predicted; GOLD = Global Initiative for Chronic Obstructive Lung Disease; CAT = COPD Assessment Test.
